# Supplementary material for: Root Interactions in a Maize/Soybean Intercropping System Control Soybean Soil-Borne Disease, Red Crown Rot
Source: PubMed Central journal article supplement (PMC4014482; doi:10.1371/journal.pone.0095031), 2014-05-08

Figure A

A

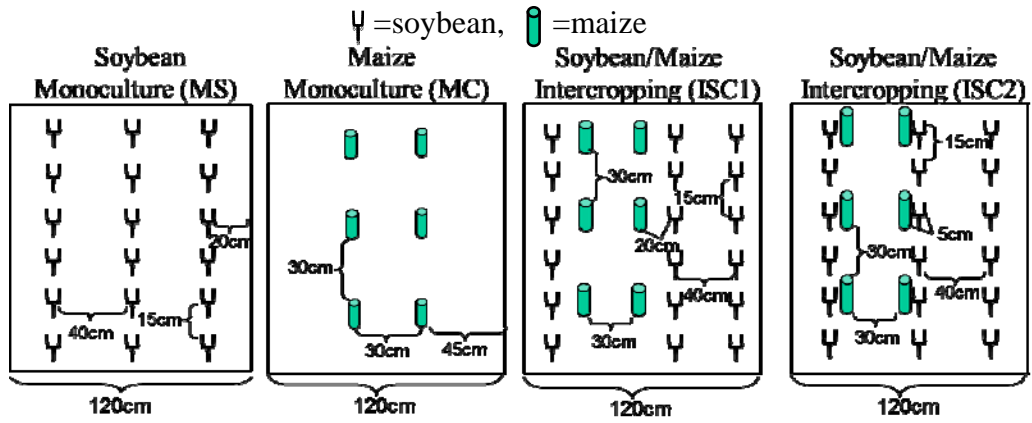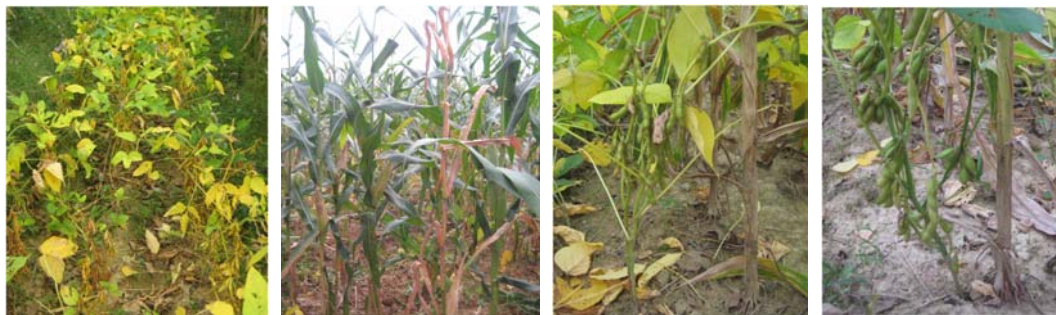

MS

MC

ISC1

ISC2

B

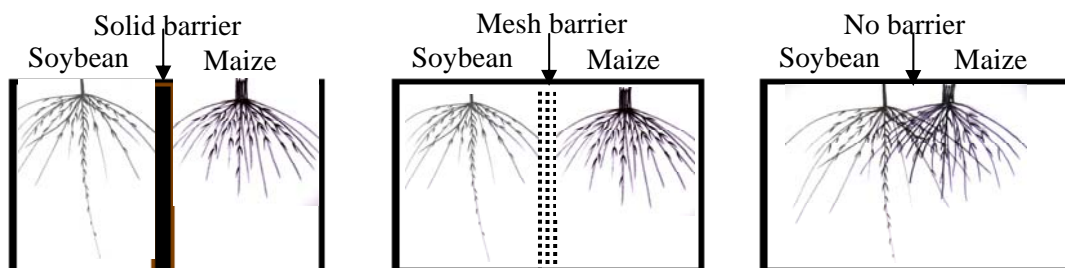

**Figure B**

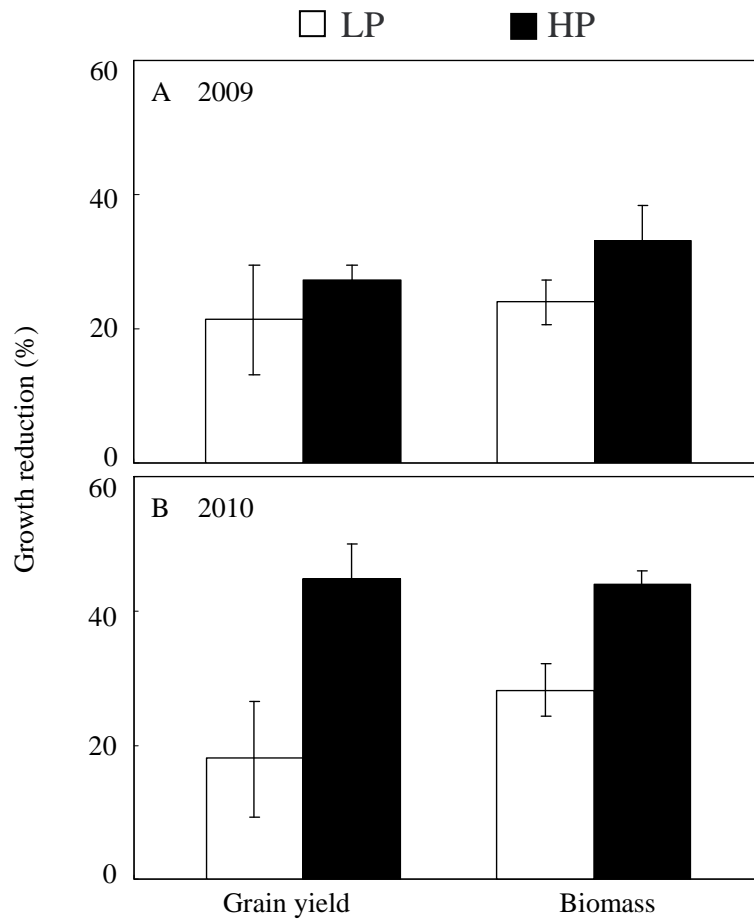

**Figure C**

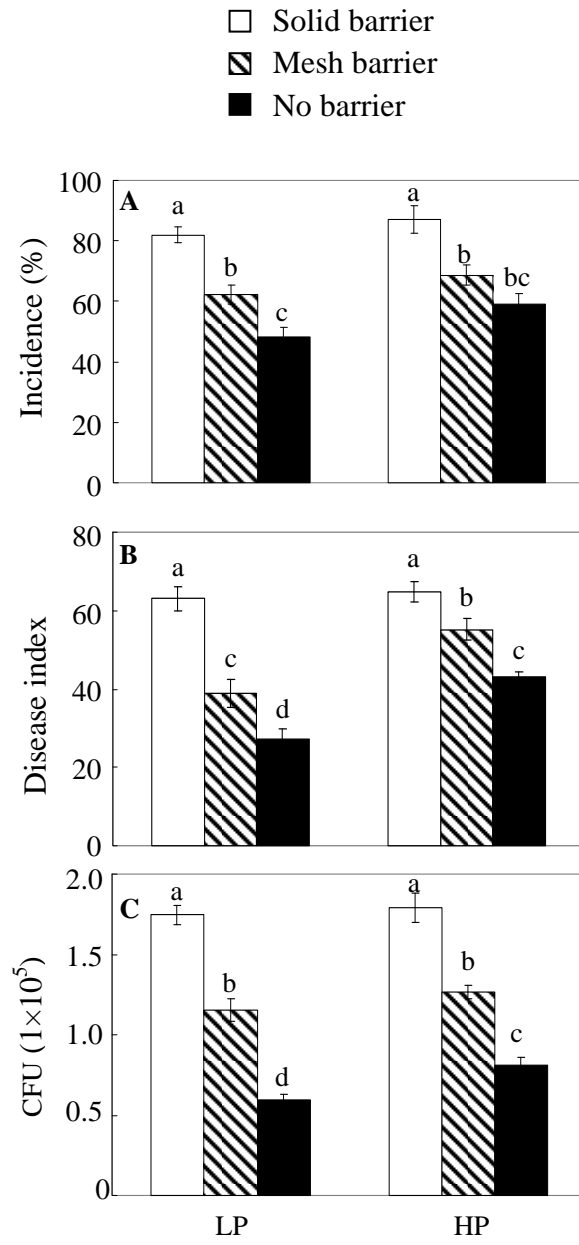

**Figure D**

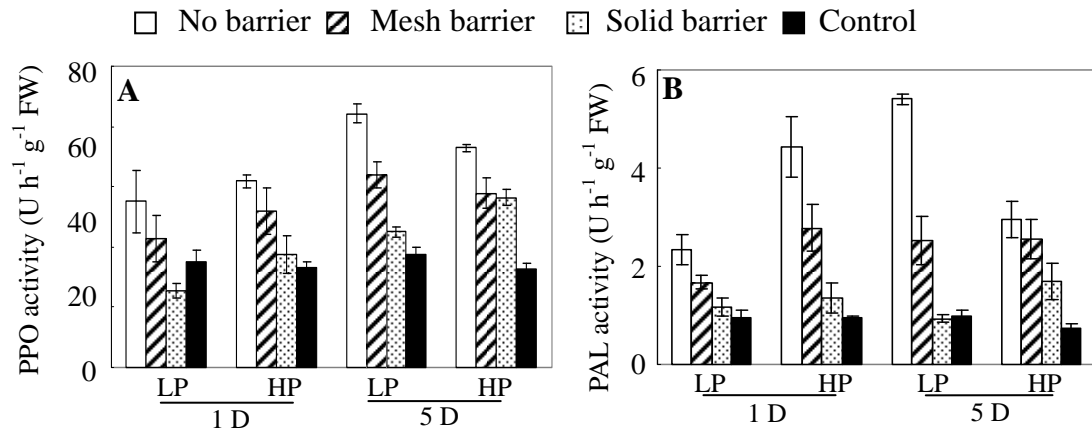

**Figure E**

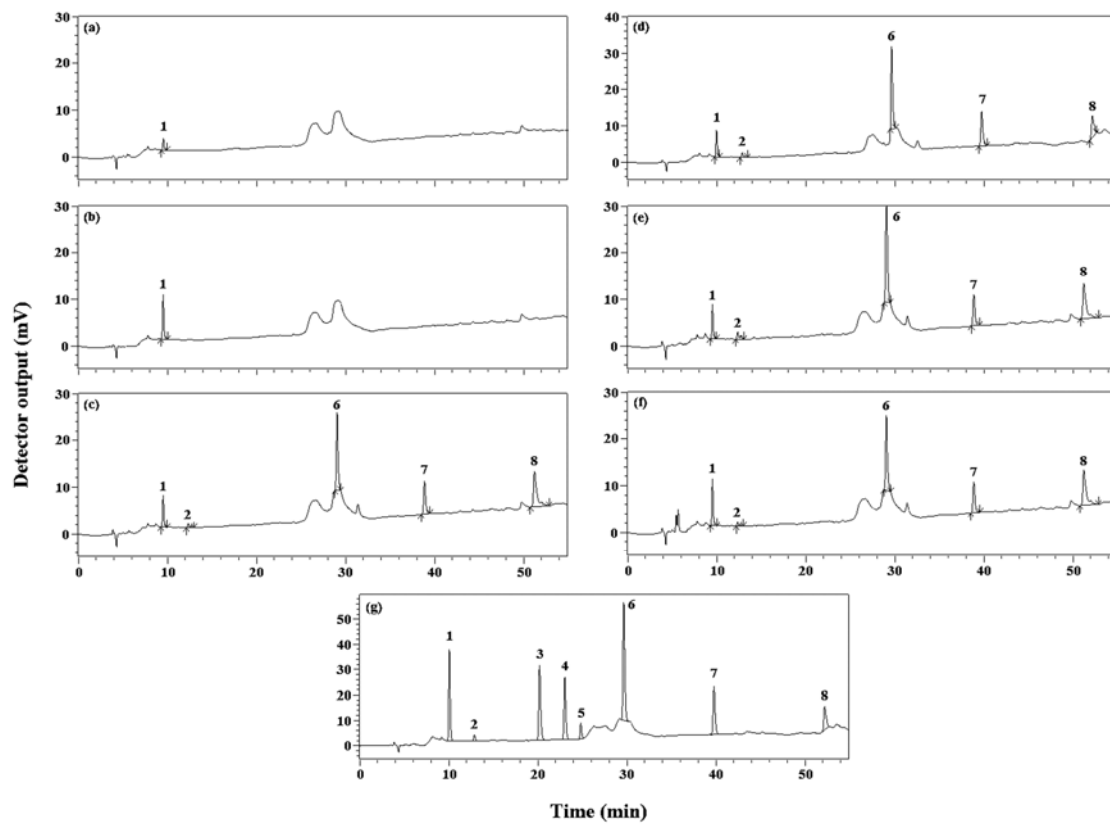

Supplement: pone.0095031.s001.pdf [file pone.0095031.s001.pdf]
